# Supplementary material for: Physical Health, Media Use, and Mental Health in Children and Adolescents With ADHD During the COVID-19 Pandemic in Australia
Source: PubMed Central journal article supplement (PMC8785303; doi:10.1177/1087054720978549), 2020-12-17
Supplement: sj-pdf-1-jad-10.1177_1087054720978549.pdf [file sj-pdf-1-jad-10.1177_1087054720978549.pdf]

## Supplementary Tables

Table 1. *Expanded data on differences in current child physical health, media use and mental health compared to 3 months prior to COVID-19*

Table 2. *Association between COVID-19 stress and dimensional changes (current functioning compared to 3 months prior to pandemic) in physical health, media use and mental health*

Figure 1. *Confirmatory factor analysis - COVID-19 worry and COVID-19 stress variables*

Supplementary Table 1.

*Expanded data on differences in current child physical health, media use and mental health compared to 3 months prior to COVID-19*

|                                                                                | <b>Pre-<br/>COVID-19</b> | <b>Pre-<br/>COVID-19</b> | <b>During<br/>COVID-19<sup>b</sup></b> | <b>During<br/>COVID-19<sup>b</sup></b> |
|--------------------------------------------------------------------------------|--------------------------|--------------------------|----------------------------------------|----------------------------------------|
|                                                                                | <i>N</i>                 | <i>%<sup>a</sup></i>     | <i>N</i>                               | <i>%<sup>b</sup></i>                   |
| <b>Physical health</b>                                                         |                          |                          |                                        |                                        |
| <i>How many hours per night did your child sleep on average?</i>               |                          |                          |                                        |                                        |
| Less than 6 hours                                                              | 12                       | 6.12                     | 18                                     | 10.06                                  |
| 6-8 hours                                                                      | 63                       | 32.14                    | 52                                     | 29.05                                  |
| 8-10 hours                                                                     | 106                      | 54.08                    | 96                                     | 53.63                                  |
| More than 10 hours                                                             | 15                       | 7.65                     | 13                                     | 7.26                                   |
| <i>How many days per week did your child exercise for at least 30 minutes?</i> |                          |                          |                                        |                                        |
| None                                                                           | 12                       | 6.12                     | 23                                     | 12.85                                  |
| 1-2 days                                                                       | 36                       | 18.37                    | 71                                     | 39.66                                  |
| 3-4 days                                                                       | 51                       | 26.02                    | 36                                     | 20.11                                  |
| 5-6 days                                                                       | 37                       | 19.39                    | 20                                     | 11.17                                  |
| Daily                                                                          | 59                       | 30.10                    | 29                                     | 16.20                                  |
| <i>How many days per week did your child spend time outdoors?</i>              |                          |                          |                                        |                                        |
| None                                                                           | 2                        | 1.02                     | 9                                      | 5.03                                   |
| 1-2 days                                                                       | 21                       | 10.71                    | 59                                     | 32.96                                  |
| 3-4 days                                                                       | 32                       | 16.33                    | 24                                     | 13.41                                  |
| 5-6 days                                                                       | 43                       | 21.94                    | 28                                     | 15.64                                  |
| Daily                                                                          | 98                       | 50.00                    | 59                                     | 32.96                                  |
| <b>Media use</b>                                                               |                          |                          |                                        |                                        |
| <i>Time per day watching TV or digital media?</i>                              |                          |                          |                                        |                                        |
| No TV or digital media                                                         | 0                        | 0                        | 1                                      | 0.56                                   |
| Under 1 hour                                                                   | 36                       | 18.85                    | 15                                     | 8.47                                   |
| 1-3 hours                                                                      | 127                      | 66.49                    | 93                                     | 52.54                                  |

|                                                                             |     |       |    |       |
|-----------------------------------------------------------------------------|-----|-------|----|-------|
| 4-6 hours                                                                   | 18  | 9.42  | 54 | 30.51 |
| More than 6 hours                                                           | 10  | 5.24  | 14 | 7.91  |
| <i>Time per day using social media?</i>                                     |     |       |    |       |
| No social media                                                             | 124 | 65.26 | 99 | 55.93 |
| Under 1 hour                                                                | 30  | 15.79 | 25 | 14.12 |
| 1-3 hours                                                                   | 28  | 14.74 | 35 | 19.77 |
| 4-6 hours                                                                   | 6   | 3.16  | 11 | 6.21  |
| More than 6 hours                                                           | 2   | 1.05  | 7  | 3.95  |
| <i>Time per day playing video games</i>                                     |     |       |    |       |
| No video games                                                              | 54  | 28.27 | 40 | 22.60 |
| Under 1 hour                                                                | 59  | 30.89 | 32 | 18.08 |
| 1-3 hours                                                                   | 57  | 29.84 | 64 | 36.16 |
| 4-6 hours                                                                   | 12  | 6.28  | 27 | 15.25 |
| More than 6 hours                                                           | 9   | 4.71  | 14 | 7.91  |
| <b>Mental health</b>                                                        |     |       |    |       |
| <i>How worried was your child generally?</i>                                |     |       |    |       |
| Not worried at all                                                          | 25  | 13.23 | 22 | 12.64 |
| Slightly worried                                                            | 78  | 41.27 | 65 | 37.36 |
| Moderately worried                                                          | 58  | 30.69 | 54 | 31.03 |
| Very worried                                                                | 24  | 12.70 | 23 | 13.22 |
| Extremely worried                                                           | 4   | 2.12  | 10 | 5.75  |
| <i>How happy versus sad was your child?</i>                                 |     |       |    |       |
| Very sad/depressed/unhappy                                                  | 4   | 2.12  | 9  | 5.17  |
| Moderately sad/depressed/unhappy                                            | 48  | 25.40 | 63 | 36.21 |
| Neutral                                                                     | 55  | 29.10 | 48 | 27.59 |
| Moderately happy/cheerful                                                   | 69  | 36.51 | 40 | 22.99 |
| Very happy/cheerful                                                         | 13  | 6.88  | 14 | 8.05  |
| <i>How much had your child been able to enjoy his/her usual activities?</i> |     |       |    |       |
| Not at all                                                                  | 12  | 6.35  | 31 | 17.92 |
| Slightly                                                                    | 26  | 13.76 | 76 | 43.93 |
| Moderately                                                                  | 46  | 24.34 | 44 | 25.43 |
| Very much                                                                   | 72  | 38.10 | 20 | 11.56 |
| A lot                                                                       | 33  | 17.46 | 2  | 1.16  |
| <i>How relaxed versus anxious was your child?</i>                           |     |       |    |       |

|                                                              |    |       |    |       |
|--------------------------------------------------------------|----|-------|----|-------|
| Very relaxed/calm                                            | 3  | 1.60  | 5  | 2.89  |
| Moderately relaxed/calm                                      | 36 | 19.15 | 31 | 17.92 |
| Neutral                                                      | 46 | 24.47 | 42 | 24.28 |
| Moderately nervous/anxious                                   | 85 | 45.21 | 73 | 42.20 |
| Very nervous/anxious                                         | 18 | 9.57  | 22 | 12.72 |
| <i>How fidgety or restless was your child?</i>               |    |       |    |       |
| Not fidgety/restless at all                                  | 6  | 3.17  | 7  | 4.05  |
| Slightly fidgety/restless                                    | 39 | 20.63 | 30 | 17.34 |
| Moderately fidgety/restless                                  | 74 | 39.15 | 51 | 29.48 |
| Very fidgety/restless                                        | 54 | 28.57 | 45 | 26.01 |
| Extremely fidgety/restless                                   | 16 | 8.47  | 40 | 23.12 |
| <i>How fatigued or tired was your child?</i>                 |    |       |    |       |
| Not fatigued or tired at all                                 | 31 | 16.58 | 24 | 13.79 |
| Slightly fatigued or tired                                   | 63 | 33.69 | 47 | 27.01 |
| Moderately fatigued or tired                                 | 68 | 36.36 | 55 | 31.61 |
| Very fatigued or tired                                       | 20 | 10.70 | 35 | 20.11 |
| Extremely fatigued or tired                                  | 5  | 2.67  | 13 | 7.47  |
| <i>How well was your child able to concentrate or focus?</i> |    |       |    |       |
| Very focused/attentive                                       | 4  | 2.13  | 8  | 4.60  |
| Moderately focused/attentive                                 | 46 | 24.47 | 25 | 14.37 |
| Neutral                                                      | 24 | 12.77 | 26 | 14.94 |
| Moderately unfocused/distracted                              | 86 | 45.74 | 67 | 38.51 |
| Very unfocused/distracted                                    | 28 | 14.89 | 48 | 27.59 |
| <i>How irritable or easily angered was your child?</i>       |    |       |    |       |
| Not irritable or easily angered at all                       | 9  | 4.79  | 9  | 5.17  |
| Slightly irritable or easily angered                         | 65 | 34.57 | 45 | 25.86 |
| Moderately irritable or easily angered                       | 55 | 29.26 | 44 | 25.29 |
| Very irritable or easily angered                             | 41 | 21.81 | 35 | 20.11 |
| Extremely irritable or easily angered                        | 18 | 9.57  | 41 | 23.56 |
| <i>How lonely was your child?</i>                            |    |       |    |       |
| Not lonely at all                                            | 71 | 37.77 | 32 | 18.39 |
| Slightly lonely                                              | 66 | 35.11 | 45 | 25.86 |
| Moderately lonely                                            | 34 | 18.09 | 54 | 31.03 |
| Very lonely                                                  | 10 | 5.32  | 32 | 18.39 |

|                                                                                                   |    |       |    |       |
|---------------------------------------------------------------------------------------------------|----|-------|----|-------|
| Extremely lonely                                                                                  | 7  | 3.72  | 11 | 6.32  |
| <i>To what extent did your child express negative thoughts or things that made them feel bad?</i> |    |       |    |       |
| Not at all                                                                                        | 15 | 7.98  | 21 | 12.07 |
| Rarely                                                                                            | 51 | 27.13 | 41 | 23.56 |
| Occasionally                                                                                      | 78 | 41.49 | 64 | 36.78 |
| Often                                                                                             | 29 | 15.43 | 29 | 16.67 |
| A lot of the time                                                                                 | 15 | 7.98  | 19 | 10.92 |

<sup>a</sup>N ranges 187-196; <sup>b</sup>N ranges 173-179

Supplementary Table 2.

*Association between COVID-19 stress and dimensional changes (current functioning compared to 3 months prior to pandemic) in physical health, media use and mental health*

|                        | Adjusted<br>COVID-19 Worries <sup>a,b</sup> |     | Adjusted<br>COVID-19 Stress <sup>a,c</sup> |       |
|------------------------|---------------------------------------------|-----|--------------------------------------------|-------|
|                        | Coef (95% CI)                               | p   | Coef (95% CI)                              | p     |
| <b>Physical health</b> |                                             |     |                                            |       |
| Sleep duration         | -0.13 (-0.24, -0.02)                        | .02 | -0.06 (-0.17, 0.06)                        | .34   |
| Physical activity      | .05 (-0.17, 0.26)                           | .66 | -0.40 (-0.63, -0.17)                       | .001  |
| Outdoor time           | .06 (-0.17, -.28)                           | .62 | -0.31 (-0.55, -0.07)                       | .01   |
| <b>Media use</b>       |                                             |     |                                            |       |
| Television             | -0.03 (-0.17, 0.11)                         | .66 | 0.09 (-0.06, 0.23)                         | .25   |
| Social media           | -0.08 (-0.18, 0.03)                         | .14 | 0.19 (0.09, 0.30)                          | <.001 |
| Gaming                 | 0.11 (-0.03, 0.25)                          | .13 | 0.03 (-0.11, 0.18)                         | 0.64  |
| <b>Mental health</b>   |                                             |     |                                            |       |
| General worry          | 0.10 (-0.08, 0.29)                          | .27 | 0.45 (0.26, 0.64)                          | <.001 |
| Sad/depressed          | 0.14 (-0.04, 0.33)                          | .13 | -0.59 (-0.79, -0.40)                       | <.001 |
| Enjoying activities    | 0.06 (-0.16, 0.28)                          | .59 | -0.68 (-0.91, -0.45)                       | <.001 |
| Anxious/nervous        | -0.07 (-0.28, 0.13)                         | .47 | 0.57 (0.36, 0.78)                          | <.001 |
| Fidgety                | -0.07 (-0.24, 0.09)                         | .37 | 0.48 (0.32, 0.65)                          | <.001 |
| Fatigue                | -0.13 (-0.30, 0.05)                         | .16 | 0.40 (0.22, 0.59)                          | <.001 |
| Distractibility        | -0.08 (-0.29, 0.14)                         | .48 | 0.51 (0.28, 0.73)                          | <.001 |
| Irritable              | -0.16 (-0.37, 0.05)                         | .14 | 0.70 (0.48, 0.93)                          | <.001 |
| Lonely                 | -0.07 (-0.26, 0.12)                         | .46 | 0.77 (0.57, 0.96)                          | <.001 |
| Negative thoughts      | -0.16 (0.34, .01)                           | .06 | 0.64 (0.46, 0.83)                          | <.001 |

<sup>a</sup> N=165-168; <sup>b</sup> Adjusted for COVID-19 stress, child age, child sex, ADHD medication use, externalizing disorder, internalizing disorder, neighbourhood socio-economic status, and financial insecurity; <sup>c</sup> Adjusted for COVID-19 worries, child age, child sex, ADHD medication use, externalizing disorder, internalizing disorder, neighbourhood socio-economic status, and financial insecurity.

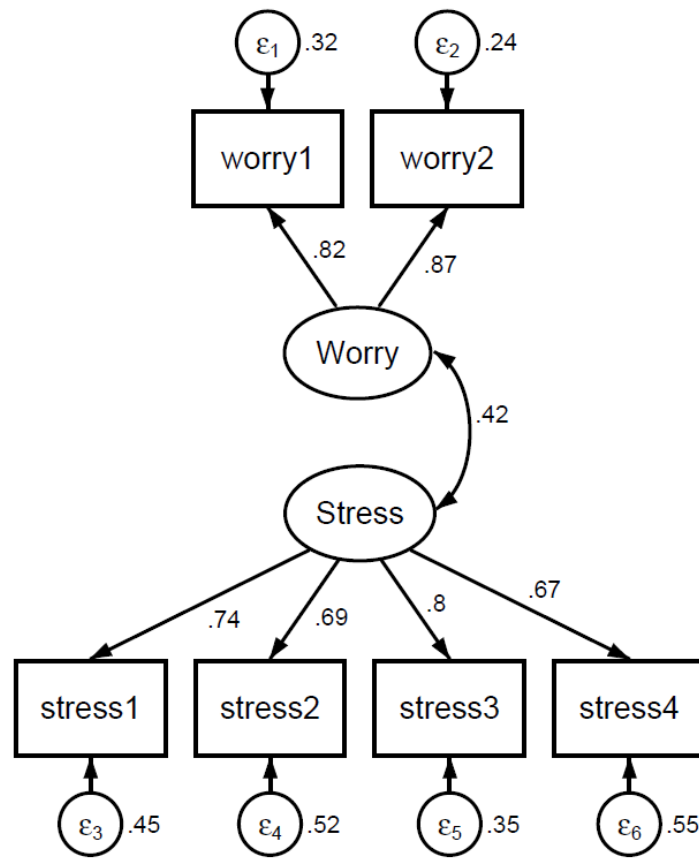

Figure 1. *Confirmatory factor analysis - COVID-19 worry and COVID-19 stress variables (n=200)*

*Note:* worry1=child worry about becoming infected, worry2=child worry about friends or family being infected, stress1=how stressful the restrictions on leaving home have been for the child, stress2= how stressful changes in family contacts have been for the child, stress3=how stressful changes in friend contacts have been for the child; stress4=difficulty experienced with cancellation of events.
